# Supplementary material for: LINC01816 promotes the migration, invasion and epithelial-mesenchymal transition of thyroid carcinoma cells by sponging miR-34c-5p and regulating CRABP2 expression levels
Source: PubMed Central journal article supplement — Oncol Rep. 2021 Mar 30;45(5):81. doi: 10.3892/or.2021.8032 (PMC8025121; doi:10.3892/or.2021.8032), 2021-03-30

Figure S1. Effect of LINC01816 in Htori-3 cells. (A) The invasion ability was measured using a Transwell assay after LINC01816 overexpression in Htori-3 cells. (B) The migration ability was measured using scratch wound healing assay after LINC01816 overexpression in Htori-3 cells. All of the aforementioned experiments were repeated at least three times. \* $P < 0.05$ . LINC01816, long intergenic non-protein coding RNA 1816.

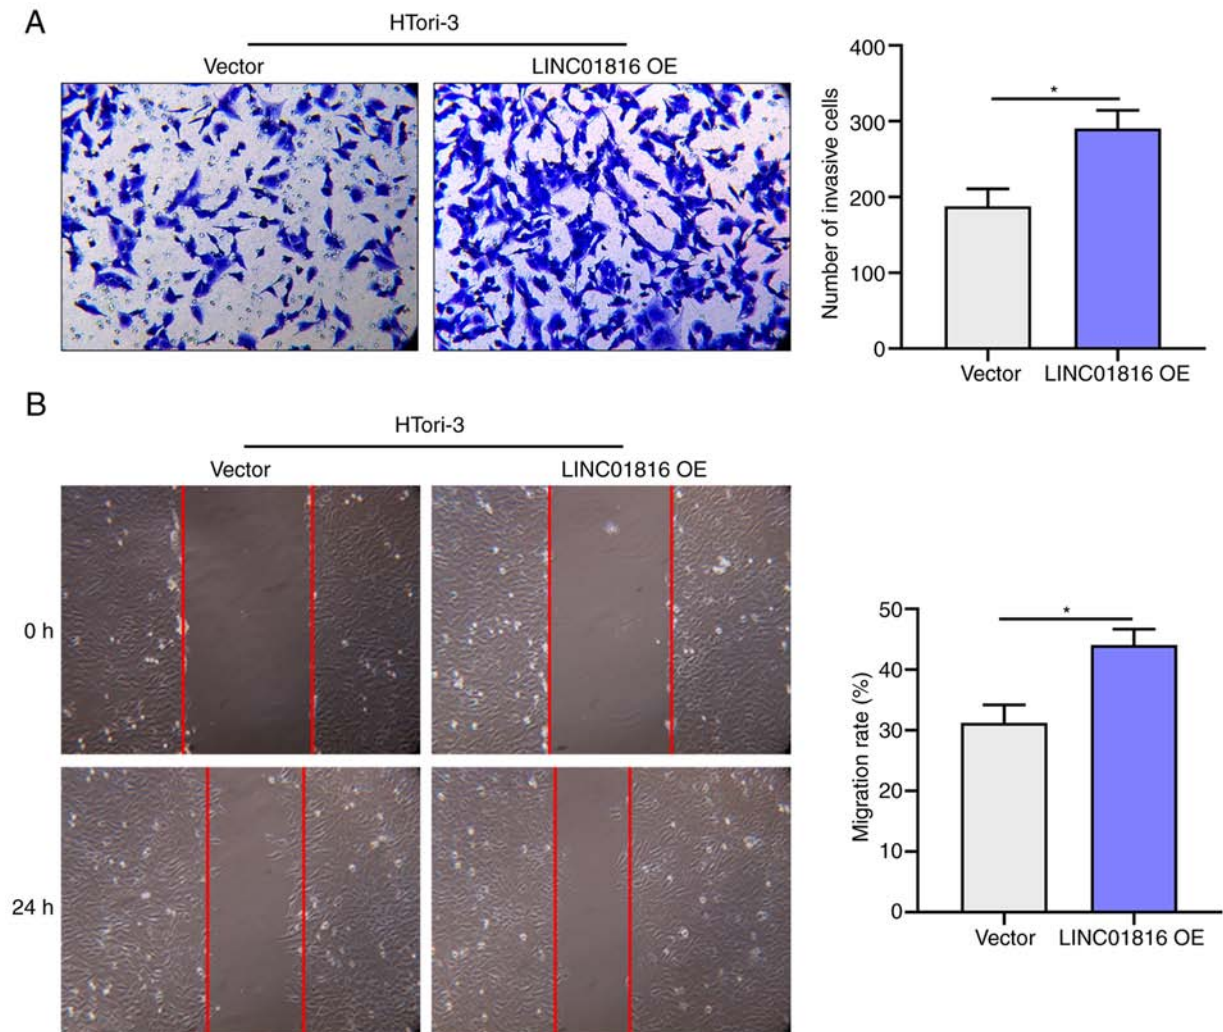

Figure S2. Effect of LINC01816 and miR-34c-5p on EMT and cell migration. (A) The protein expression levels of E-cadherin, N-cadherin and vimentin were detected after LINC01816 or miR-34c-5p silencing in C643 cells. (B and C) The invasion and migration abilities were assessed after LINC01816 or miR-34c-5p silencing in C643 cells. All of the aforementioned experiments were repeated at least three times. \* $P < 0.05$ , \*\* $P < 0.01$  and \*\*\* $P < 0.001$ . LINC01816, long intergenic non-protein coding RNA 1816; miR-34c-5p, microRNA-34c-5p; EMT, epithelial-mesenchymal transition; si-, small interfering; NC, negative control.

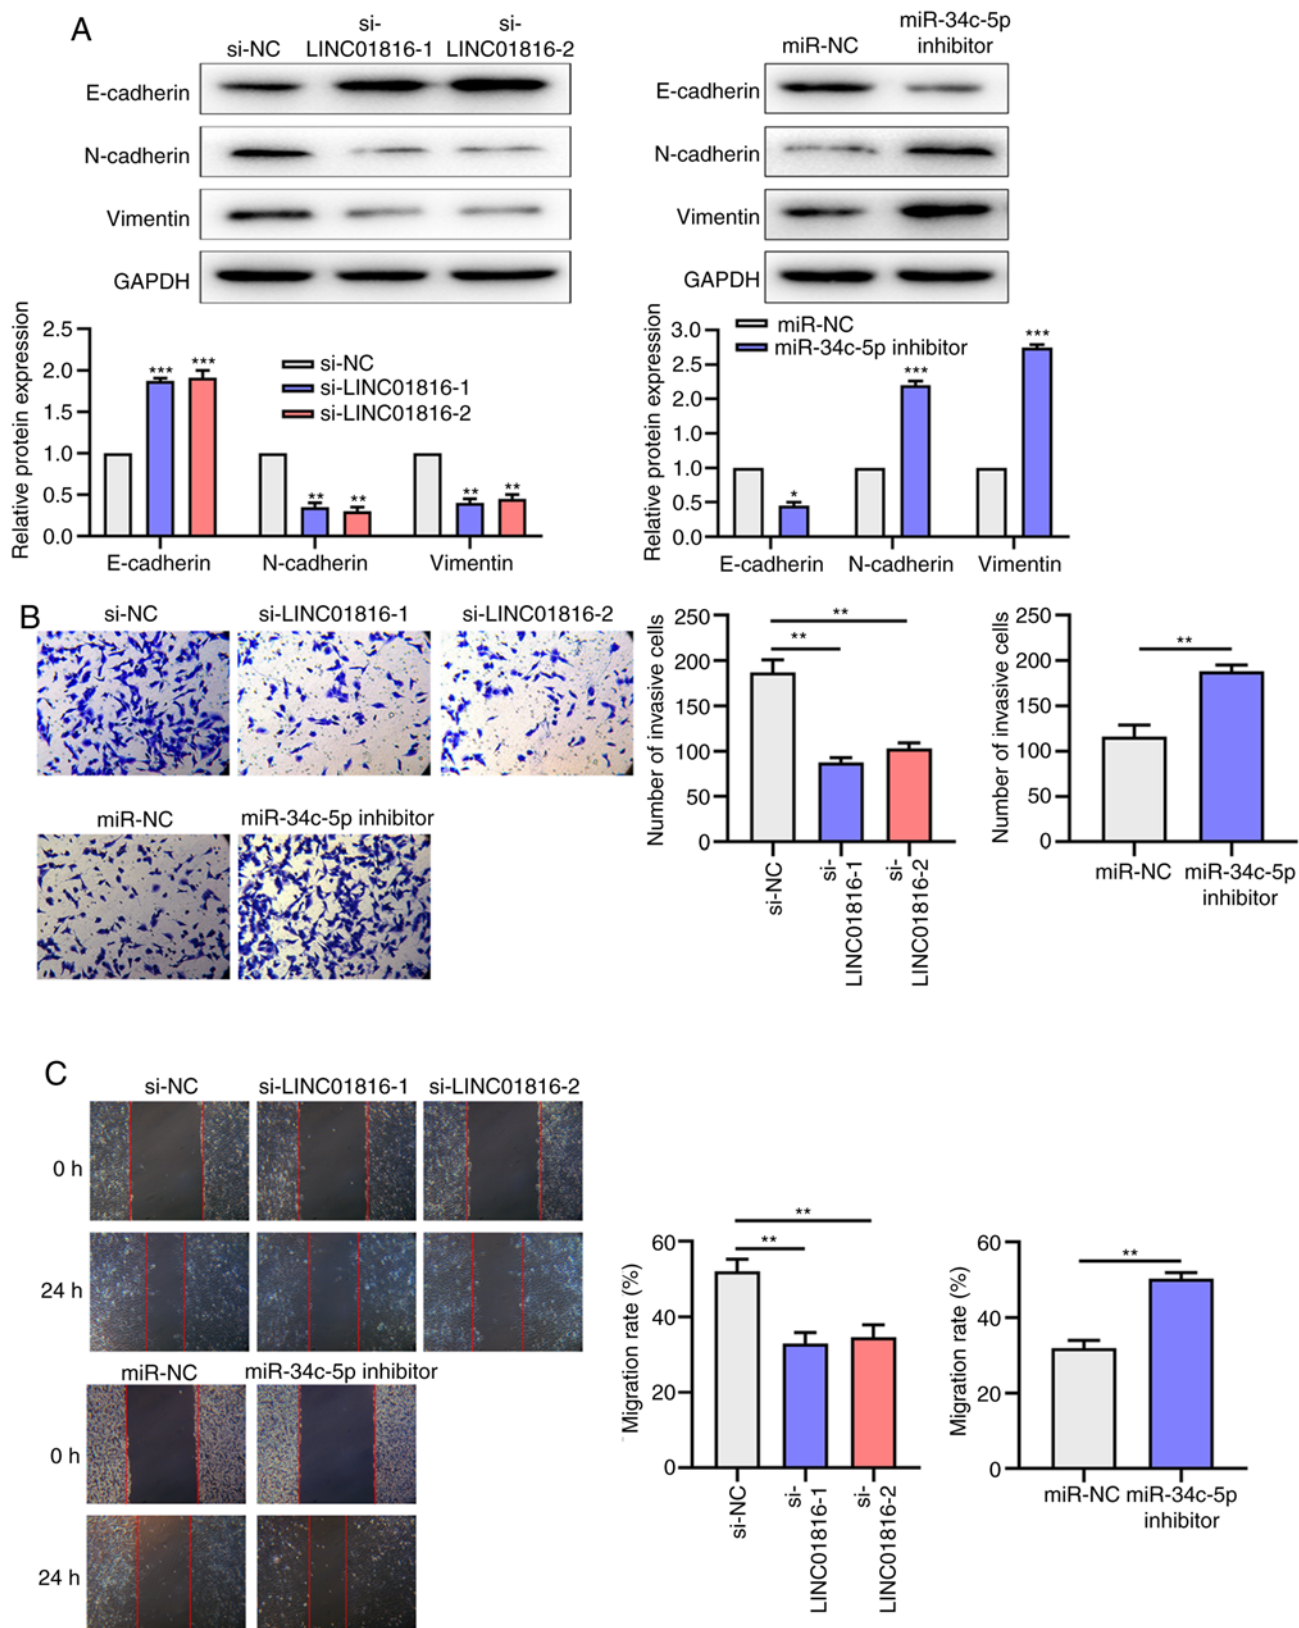

Figure S3. Effect of LINC01816 on the cell cycle and apoptosis. (A) Cell cycles were analyzed using flow cytometry after LINC01816 overexpression. (B) The protein expression of cyclin D1, cyclin E, p27 and p21 were detected after LINC01816 overexpression. (C) The protein expression of cleaved caspase-3, cleaved PARP, Bax and Bcl-2 were detected after LINC01816 overexpression. All of the aforementioned experiments were repeated at least three times. \* $P < 0.05$ , \*\* $P < 0.01$ . LINC01816, long intergenic non-protein coding RNA 1816; OE, overexpression.

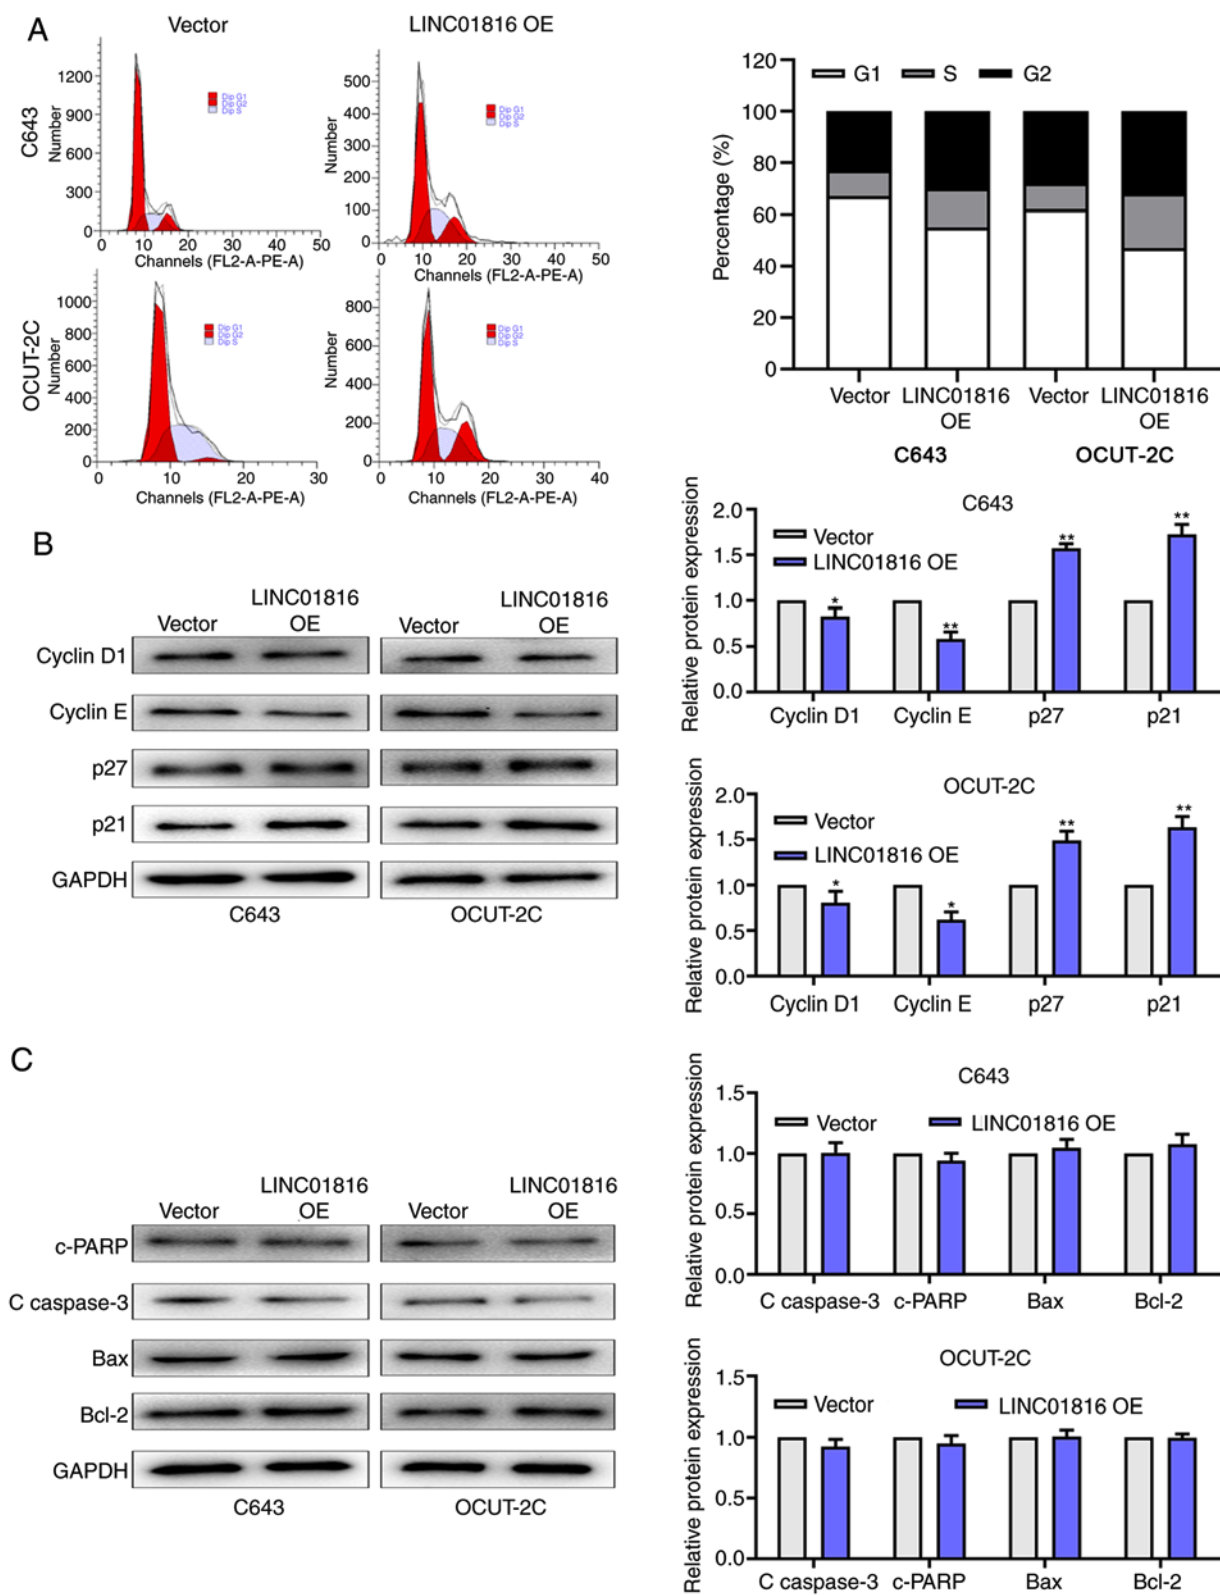

Figure S4. KEGG pathway analysis of the target genes of miR-34c-5p. The top 20 enriched KEGG pathways are presented. KEGG, Kyoto Encyclopedia of Genes and Genomes; miR-34c-5p, microRNA-34c-5p.

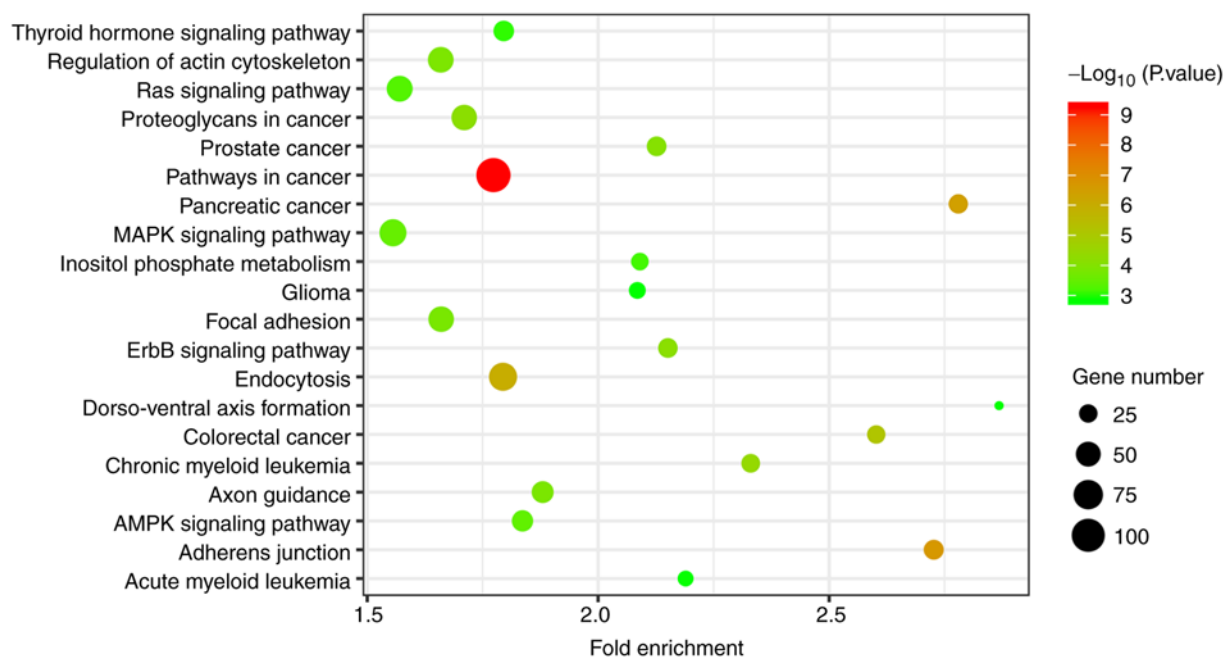

Supplement: Supplementary_Data1.pdf [file Supplementary_Data1.pdf]
